# Supplementary material for: Multiple Rounds of Artificial Selection Promote Microbe Secondary Domestication—The Case of Cachaça Yeasts
Source: PubMed Central journal article supplement — Genome Biol Evol. 2018 Jul 2;10(8):1939–55. doi: 10.1093/gbe/evy132 (PMC6101510; doi:10.1093/gbe/evy132), 2018-07-02
Supplement: evy132_suplementary_data.pdf [file evy132_suplementary_data.pdf]

Supplementary table S1. Strains and genomes used in this study and relevant information pertaining to them.

| Strain         | Other designations    | Substrate of Isolation                    | Geographic location              | Phylogeny | Heterozygous sites (Q > 40) | Monoisomic (MD) / single cell (SCD) derivative | A | B     | C     | AQY1    | AQY1     | AQY1    | AQY2     | AQY2     | AQY2     | RTM1 | BIO1 / BIO6 | PAD1 | FOC1 | FZF1 | FZF1 Fig 4 | FZF1 Fig 52 | SSU1 | SSU1R | Genome data  | Reference                         |
|----------------|-----------------------|-------------------------------------------|----------------------------------|-----------|-----------------------------|------------------------------------------------|---|-------|-------|---------|----------|---------|----------|----------|----------|------|-------------|------|------|------|------------|-------------|------|-------|--------------|-----------------------------------|
| AWRI 1631      | N 96                  | Wine                                      | Australia                        | Wine      | n.d.                        |                                                |   | 8/19  | NF    | A881del |          | NF      | 11bp del |          |          |      |             | F    | F    | W    |            |             |      |       | PRINA30553   | Borneman et al. 2008              |
| AWRI 796       | Active Dry Wine Yeast | Commercial wine yeast                     | South Africa                     | Wine      | 1041 *                      |                                                |   |       | DUP   | NF      |          | NF      | 11bp del |          |          |      |             | F    | F    |      |            |             |      |       | PRINA48559   | Borneman et al. 2011              |
| EXF 6719       |                       | Wine must                                 | Cuber, Slovenia                  | Wine      | 2053                        |                                                |   | 17/19 | NF    | A881del |          | NF      | 11bp del |          |          |      |             | F    | F    | W    |            |             |      |       | PRJEB7601    | Almeida et al. 2015               |
| ZP 641         |                       | Spontaneous red wine fermental            | Castelo de Vide, Portugal        | Wine      | 1484                        |                                                |   |       |       | NF      | A881del  |         | NF       | 11bp del |          |      |             | F    | F    |      |            |             |      |       | PRJEB7601    | Almeida et al. 2015               |
| L1374          |                       | Wine (must from Pais variety)             | Cauquenes, Chile                 | Wine      | 1550                        |                                                |   | 5/5   | NF    | A881del |          | NF      | 11bp del |          |          |      |             | F    | F    |      |            |             |      |       | SGRP2        | Bergström et al. 2014             |
| L1528          |                       | Wine (must from Cabernet variety)         | Cauquenes, Chile                 | Wine      | 1334                        |                                                |   | 5/5   | NF    | A881del |          | NF      | 11bp del |          |          |      |             | F    | F    |      |            |             |      |       | SGRP2        | Bergström et al. 2014             |
| Lalvin BM45    | AWRI 1486             | Commercial yeast (white wine)             |                                  | Wine      | 1280                        |                                                |   | 5/5   | 2/19  | NF      | A881del  |         | NF       | 11bp del |          |      |             | F    | F    |      |            |             |      |       | PRJEB19382   | Almeida et al. 2017               |
| Lalvin CY-3079 | AWRI 2078             | Commercial yeast (red wine)               |                                  | Wine      | 1974                        |                                                |   | 5/5   | 4/19  | NF      | A881del  |         | NF       | 11bp del |          |      |             | F    | F    |      |            |             |      |       | PRJEB19382   | Almeida et al. 2017               |
| Lalvin W45     |                       | Commercial yeast (white and red wine)     |                                  | Wine      | 2209                        |                                                |   | 5/5   | NF    | A881del |          | NF      | 11bp del |          |          |      |             | F    | F    |      |            |             |      |       | PRJEB19382   | Almeida et al. 2017               |
| PR             |                       | Pasteur Red                               |                                  | Wine      | 1715                        |                                                |   |       |       | NF      | A881del  |         | NF       | 11bp del |          |      |             | F    | F    | W    |            |             |      |       | PRJEB19382   | Almeida et al. 2017               |
| PVCC 4072      |                       | commercial wine yeast (Fermivin)          | Portugal                         | Wine      | 1889                        |                                                |   |       |       | NF      | A881del  |         | NF       | 11bp del |          |      |             | F    | F    |      |            |             |      |       | PRJEB19382   | Almeida et al. 2017               |
| TUM V1         |                       | Bordeaux wine                             |                                  | Wine      | 1827                        |                                                |   |       |       | NF      | A881del  |         | NF       | 11bp del |          |      |             | F    | F    |      |            |             |      |       | PRJEB19382   | Almeida et al. 2017               |
| Uvaferm SGV    |                       | Commercial yeast (red wine)               |                                  | Wine      | 1734                        |                                                |   |       | 4/19  | NF      | A881del  |         | NF       | 11bp del |          |      |             | F    | F    |      |            |             |      |       | PRJEB19382   | Almeida et al. 2017               |
| Uvaferm VRB    |                       | Commercial yeast (red wine)               |                                  | Wine      | 2750                        |                                                |   | 19/19 | NF    | A881del |          | NF      | 11bp del |          |          |      |             | F    | F    |      |            |             |      |       | PRJEB19382   | Almeida et al. 2017               |
| Vin 13         | AWRI 1537             | Commercial wine yeast                     |                                  | Wine      | 15216 *                     |                                                |   | Dup   | 2/19  | F       |          | NF      | 11bp del |          |          |      |             | F    | F    |      |            |             |      |       | PRJNA48563   | Borneman et al. 2011              |
| VL3            | B 6, AWRI 1688        | Commercial wine yeast                     |                                  | Wine      | 9904 *                      |                                                |   | 5/5   | 8/19  | NF      | A881del  |         | NF       | 11bp del |          |      |             | F    | F    |      |            |             |      |       | PRJNA48565   | Borneman et al. 2011              |
| WE 372         |                       | Commercial wine yeast                     | Cape Town, South Africa          | Wine      | 4354                        |                                                |   | 5/5   |       | F       |          | NF      | 11bp del |          |          |      |             | F    | F    |      |            |             |      |       | PRJNA60199   | Justin Fay, Washington University |
| YJM 1332       |                       | Wine                                      | Italy                            | Wine      | 1660                        |                                                |   | 2/19  | NF    | A881del |          | NF      | 11bp del |          |          |      |             | F    | F    |      |            |             |      |       | PRJNA189896  | Strope et al. 2015                |
| YJM 1336       |                       | Wine                                      | Italy                            | Wine      | 1547                        |                                                |   |       |       | NF      | A881del  |         | NF       | 11bp del |          |      |             | F    | F    |      |            |             |      |       | PRJNA189897  | Strope et al. 2015                |
| YJM 1341       | NRRL Y-12637          | Grape must                                | South Africa                     | Wine      | 2350                        |                                                |   |       |       | NF      | A881del  |         | NF       | 11bp del |          |      |             | F    | F    |      |            |             |      |       | PRJNA189899  | Strope et al. 2015                |
| YJM 1415       | NRRL Y-268            | Wine                                      | France                           | Wine      | 1256                        |                                                |   | 5/5   | 19/19 | NF      | A881del  |         | NF       | 11bp del |          |      |             | F    | F    |      |            |             |      |       | PRJNA189914  | Strope et al. 2015                |
| EC 1118        | Prise de Mousse       | Industrial strain isolated from Champagne | France                           | Wine      | n.d.                        |                                                |   | 15/15 | 5/5   | 19/19   | NF       | A881del |          | NF       | 11bp del |      |             |      | F    | F    | W          |             |      |       | PRJEA37863   | Novo et al. 2009                  |
| IOC 18-2007    | AWRI 2340             | Commercial yeast                          |                                  | Wine      | 2181                        |                                                |   |       |       | NF      | A881del  |         | F        |          |          |      |             | F    | F    |      |            |             |      |       | PRJEB19382   | Almeida et al. 2017               |
| IOC 9002       |                       | Commercial wine yeast                     |                                  | Wine      | 1224                        |                                                |   |       | 5/5   | 4/19    | NF       | A881del |          | NF       | 11bp del |      |             |      | F    | F    | W          |             |      |       | PRJNA264372  | Almeida et al. 2015               |
| Lalvin QA23    |                       | Commercial wine yeast                     | Portugal                         | Wine      | 18861 *                     |                                                |   | 15/15 | TRIP  | 19/19   | NF       | A881del |          | F        |          |      |             | F    | F    |      |            |             |      |       | PRJNA48561   | Borneman et al. 2011              |
| YJM 1574       | AWRI 1775             | Wine                                      |                                  | Wine      | 1796                        |                                                |   |       | 5/5   | NF      | A881del  |         | NF       | 11bp del |          |      |             | F    | F    |      |            |             |      |       | PRJNA189934  | Strope et al. 2015                |
| YJM 270        | CBS 2807              | Wine                                      | Slovenia                         | Wine      | 1662                        |                                                |   |       | 19/19 | NF      | A881del  |         | F        |          |          |      |             | F    | F    |      |            |             |      |       | PRJNA189852  | Strope et al. 2015                |
| PVCC 4074      |                       | commercial wine yeast (Fermicha)          | Portugal                         | Wine      | 2263                        |                                                |   | 15/15 | 5/5   |         | NF       | A881del |          | F        |          |      |             | F    | F    |      |            |             |      |       | PRJEB19382   | Almeida et al. 2017               |
| PVCC 6722      | CBS 5155              | wine                                      | South Armenia                    | Wine      | 2121                        |                                                |   |       |       | NF      | A881del  |         | F        |          |          |      |             | F    | F    |      |            |             |      |       | PRJEB19382   | Almeida et al. 2017               |
| PVCC 6726      |                       | Jerez-wine                                | Spain                            | Wine      | 4939                        |                                                |   |       |       | NF      | A881del  |         | F        |          |          |      |             | F    | F    |      |            |             |      |       | PRJEB19382   | Almeida et al. 2017               |
| PVCC 6729      |                       | Jerez-wine                                | Armenia                          | Wine      | 2901                        |                                                |   |       |       | NF      | A881del  |         | F        |          |          |      |             | F    | F    |      |            |             |      |       | PRJEB19382   | Almeida et al. 2017               |
| UFMG-CM-Y215   | SP9                   | Cachaça                                   | São Paulo, Brazil                | Wine      | 3242                        | MD                                             |   |       |       | NF      | A881del  |         | NF       | 11bp del |          |      |             | F    | F    |      |            |             |      |       | PRJEB24932   | This study                        |
| UFMG-CM-Y617   | JB 03                 | Jabuticaba wine                           | Santa Bárbara, Minas Gerais      | Wine      | 2805                        | SCD                                            |   |       |       | NF      | A881del  |         | NF       | 11bp del |          |      |             | F    | F    | W    |            |             |      |       | PRJEB24932   | This study                        |
| UFMG-CM-Y618   | JB 79                 | Jabuticaba wine                           | Santa Bárbara, Minas Gerais      | Wine      | 3384                        | MD                                             |   | 5/5   | 17/19 | NF      | A881del  |         | NF       | 11bp del |          |      |             | F    | F    |      |            |             |      |       | PRJEB24932   | This study                        |
| UFMG-CM-Y619   | JB 107                | Jabuticaba wine                           | Santa Bárbara, Minas Gerais      | Wine      | 3317                        | MD                                             |   | 5/5   | 18/19 | NF      | A881del  |         | NF       | 11bp del |          |      |             | F    | F    |      |            |             |      |       | PRJEB24932   | This study                        |
| UFMG-CM-Y620   | V68                   | Wine                                      | Casa Nova, Bahia, Brazil         | Wine      | 3036                        | MD                                             |   | 5/5   |       | F       |          | NF      | 11bp del |          |          |      |             | F    | F    |      |            |             |      |       | PRJEB24932   | This study                        |
| UFMG-CM-Y621   | V152                  | Wine                                      | Casa Nova, Bahia, Brazil         | Wine      | 3277                        | MD                                             |   | 5/5   |       | F       |          | NF      | 11bp del |          |          |      |             |      | F    | F    |            |             |      |       | PRJEB24932   | This study                        |
| PVR 4b         | DBQ 26                | <i>Quercus pubescens</i>                  | Halkidiki, Greece                | MO        | 2738                        |                                                |   |       |       | F       |          | F       |          |          |          |      |             | F    | F    |      |            |             |      |       | PRJEB7601    | Almeida et al. 2015               |
| OakRom 3-2a    |                       | Oak                                       | Near Bucarest, Romania           | MO        | 2366                        |                                                |   |       |       | F       |          | F       |          |          |          |      |             | F    | F    |      |            |             |      |       | PRJEB7675    | Almeida et al. 2015               |
| EXF 7200       |                       | <i>Quercus robur</i>                      | Jasenovo polje, Montenegro       | MO        | 3001                        |                                                |   |       |       | F       |          | F       |          |          |          |      |             | F    | F    |      |            |             |      |       | PRJNA264372  | Almeida et al. 2015               |
| HUN 9-131      | DBS 14                | Oak                                       | Hungary                          | MO        | 2745                        |                                                |   |       |       | F       |          | F       |          |          |          |      |             | F    | F    |      |            |             |      |       | PRJEB7601    | Almeida et al. 2015               |
| 3-10           | DBVPS 10100           | <i>Quercus cerris</i>                     | Parco del Monte Subasio, Italy   | MO        | 3800                        |                                                |   |       |       | F       |          | F       |          |          |          |      |             | F    | F    |      |            |             |      |       | PRJEB7601    | Almeida et al. 2015               |
| ZP 541         |                       | <i>Fagus sylvatica</i>                    | Adagoi, Portugal                 | MO        | 2684                        |                                                |   |       |       | F       |          | F       |          |          |          |      |             | F    | F    |      |            |             |      |       | PRJEB7601    | Almeida et al. 2015               |
| ZP 1008        |                       | <i>Quercus faginea</i>                    | Eja, Melres, Douro, Portugal     | MO        | 2409                        |                                                |   |       | n.d.  |         |          |         | n.d.     |          |          |      |             | n.d. | n.d. |      |            |             |      |       | PRJNA264372  | Almeida et al. 2015               |
| ZP 570         |                       | <i>Fraxinus sp.</i>                       | Paul Boquilobo, Portugal         | MO        | 2813                        |                                                |   |       |       | F       |          | F       |          |          |          |      |             | F    | F    |      |            |             |      |       | PRJEB7601    | Almeida et al. 2015               |
| ZP 848         |                       | <i>Quercus ilex</i>                       | Alter do Chão, Portugal          | MO        | 2656                        |                                                |   |       |       | F       |          | F       |          |          |          |      |             | F    | F    |      |            |             |      |       | PRJEB7675    | Almeida et al. 2015               |
| ZP 850         |                       | <i>Quercus ilex</i>                       | Alconorales Natural Park, Aragon | MO        | 2869                        |                                                |   |       |       | F       |          | F       |          |          |          |      |             | F    | F    |      |            |             |      |       | PRJEB7601    | Almeida et al. 2015               |
| MB 7c          |                       | <i>Quercus pubescens</i>                  | Montbarri, Southern France       | MO        | 3752                        |                                                |   |       | n.d.  |         |          |         | n.d.     |          |          |      |             | n.d. | n.d. |      |            |             |      |       | PRJNA264372  | Almeida et al. 2015               |
| ZP 560         |                       | <i>Quercus pyrenaica</i>                  | Castelo de Vide, Portugal        | MO        | 2553                        |                                                |   |       |       | F       |          | F       |          |          |          |      |             | F    | F    |      |            |             |      |       | PRJEB7601    | Almeida et al. 2015               |
| BE013          |                       | Beer (Ale refermentation)                 | Belgium                          | Beer 2    | n.d.                        |                                                |   | 5/5   |       | NF      | A881del  |         | F        |          |          |      |             | F    | F    | W    |            |             |      |       | MBZP00000000 | Gallone et al. 2016               |
| BE021          |                       | Beer (Pale ale)                           | Canada                           | Beer 2    | n.d.                        |                                                |   | 5/5   |       | NF      | A881del  |         | F        |          |          |      |             | F    | F    |      |            |             |      |       | MBZH00000000 | Gallone et al. 2016               |
| BE032          |                       | Beer                                      | England                          | Beer 2    | n.d.                        |                                                |   | 5/5   | 4/19  | NF      | A881del  |         | NF       | 11bp del |          |      |             | F    | F    |      |            |             |      |       | MBYW00000000 | Gallone et al. 2016               |
| BE063          |                       | Beer                                      | England                          | Beer 2    | n.d.                        |                                                |   | 15/15 | 5/5   | NF      | V121Mpol |         | F        |          |          |      |             | F    | F    | W    |            |             |      |       | MBXR00000000 | Gallone et al. 2016               |
| BE083          |                       | Beer (Season)                             | Belgium                          | Beer 2    | n.d.                        |                                                |   | 5/5   |       | NF      | A881del  |         | NF       | 11bp del |          |      |             | F    | F    |      |            |             |      |       | MBW00000000  | Gallone et al. 2016               |
| BE092          |                       | Beer (strong ale)                         | Belgium                          | Beer 2    | n.d.                        |                                                |   | 15/15 |       | NF      | A881del  |         | F        |          |          |      |             | F    | F    |      |            |             |      |       | MBW00000000  | Gallone et al. 2016               |
| UFMG-CM-Y030   | CAY1007               | Cachaça (commercial strain)               | Minas Gerais, Brazil             | C1        | 31074                       | SCD                                            |   | 5/5   |       | NF      | A881del  |         | NF       | 625del   |          |      |             | F    | F    | W    |            |             |      |       | PRJEB24932   | This study                        |
| UFMG-CM-Y625   | CAY2170               | Cachaça                                   | Novo Cruzeiro, Minas Gerais      | C1        | 4737                        | SCD                                            |   | 5/5   |       | NF      | T498del  |         | NF       | 11bp del |          |      |             | F    | F    | W    |            |             |      |       | PRJEB24932   | This study                        |
| UFMG-CM-Y251   | SC1                   | Cachaça                                   | Santa Catarina, Brazil           | C1        | 12655                       | SCD                                            |   | 5/5   | 19/19 | NF      | A881del  |         | NF       | 11bp del |          |      |             | F    | F    | C    |            |             |      |       | PRJEB24932   | This study                        |
| UFMG-CM-Y630   | SC3                   | Cachaça                                   | Santa Catarina, Brazil           | C1        | 3570                        | MD                                             |   | 5/5   |       | F       |          | NF      | 11bp del |          |          |      |             | F    | F    | C    |            |             |      |       |              |                                   |





**Supplementary table S2.** Tolerance to ferulic acid (0.2% w/v, pH 4.5) of cachaça strains with and without *PAD1 / FDC1* introgression from *S. paradoxus*. Growth was assessed in Yeast-Peptone-Glucose agar medium supplemented with ferulic acid. Strong (+++), intermediate (++) or low (+) growth was recorded after inoculation of serially diluted ( $10^{-2}$ ,  $10^{-3}$  and  $10^{-4}$ ) 10  $\mu$ l drops of a culture grown in liquid medium without ferulic acid up to a OD<sub>640nm</sub> of 0.3 – 0.4 and 48h incubation at 25 °C. For comparison the results of two wild Brazilian strains with high resistance to ferulic acid are included.

| Strain   | <i>PAD1 / FDC1</i><br><i>S. paradoxus</i><br>introgressions | Phylogeny      | Tolerance to ferulic acid |
|----------|-------------------------------------------------------------|----------------|---------------------------|
| CAY 1007 | present                                                     | cachaça        | ++                        |
| CAY 1834 | present                                                     | cachaça        | +                         |
| CAY 2170 | present                                                     | cachaça        | +                         |
| RJ1      | present                                                     | cachaça        | ++                        |
| T01      | present                                                     | cachaça        | ++                        |
| TOC1301  | present                                                     | cachaça        | +                         |
| TOC1346  | present                                                     | cachaça        | ++                        |
| CAY44    | present                                                     | cachaça        | +                         |
| RJW03    | absent                                                      | cachaça        | +                         |
| SC1      | absent                                                      | cachaça        | ++                        |
| SC3      | absent                                                      | cachaça        | +                         |
| SC7      | absent                                                      | cachaça        | +                         |
| T09      | absent                                                      | cachaça        | +                         |
| YEF036   | absent                                                      | cachaça        | +                         |
| YEF034   | absent                                                      | cachaça        | ++                        |
| RJ15     | absent                                                      | cachaça        | +                         |
| 49-30    | absent                                                      | wild Brazil B1 | +++                       |
| TOC 1345 | absent                                                      | wild Brazil B3 | +++                       |



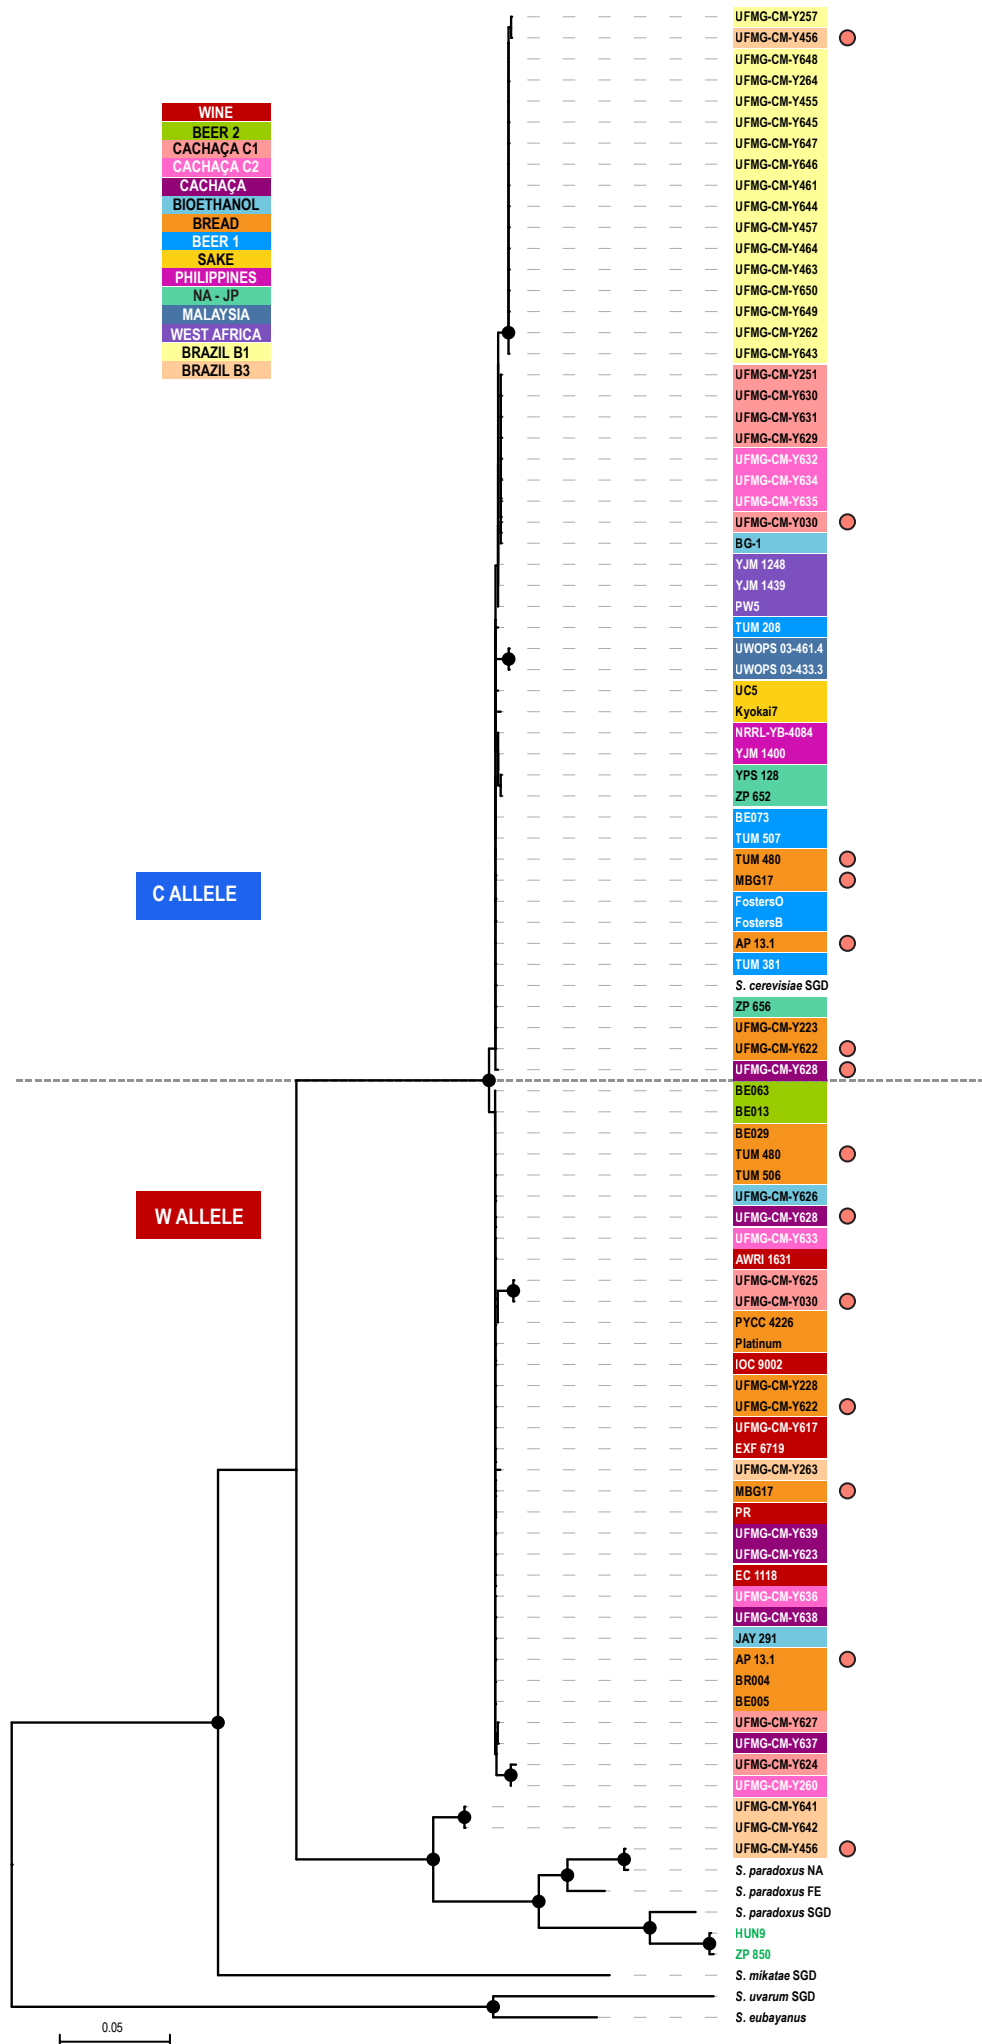

FIGS2

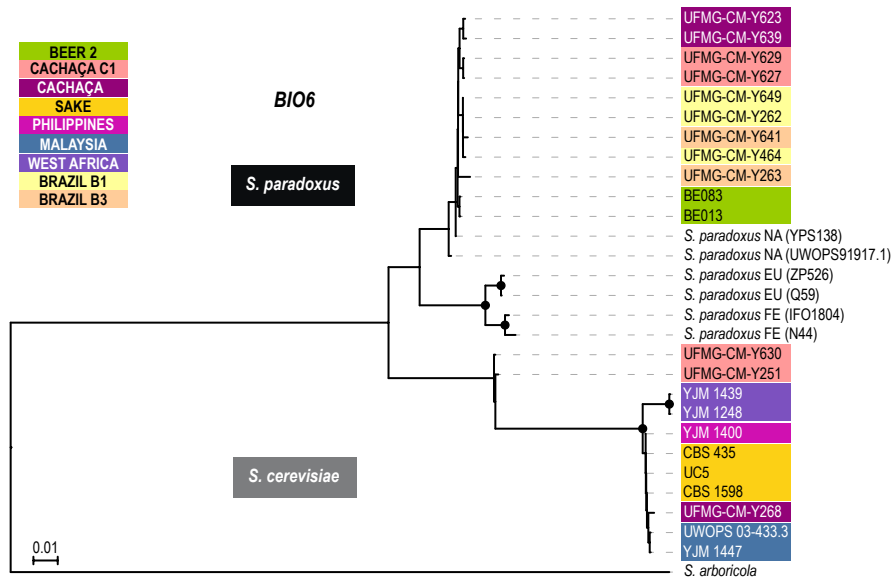

FIGS3
